# Supplementary material
Source: HighWire-hosted journal article supplement (https://bmjopen.bmj.com/content/11/12/e058478)
Supplement: inline-supplementary-material-1 [file inline-supplementary-material-1.pdf]

SUPPLEMENT

**Supplementary Table 1.** The associations between strength, function and cognition in men with prostate cancer treated with androgen deprivation therapy (ADT; n=70), prostate cancer controls (PCON; n=52) and healthy controls (HCON; n=70) pooled.

| Variable                          | Leg press 3RM | Grip strength | Gait speed | 400m walk  | TUGC       |
|-----------------------------------|---------------|---------------|------------|------------|------------|
| Rey Auditory Verbal Learning Test |               |               |            |            |            |
| Immediate recall                  | 0.195*        | 0.111         | 0.159*     | -0.300***  | -0.272***  |
| Verbal learning                   | 0.184*        | 0.143         | 0.184*     | -0.368***  | -0.296***  |
| Delayed recall                    | 0.062         | 0.106         | 0.139      | -0.298***  | -0.189*    |
| Digit span                        |               |               |            |            |            |
| Verbal recall                     | 0.146         | 0.106         | 0.138      | -0.248**** | -0.263***  |
| Verbal working memory             | 0.131         | 0.102         | 0.191*     | -0.153*    | -0.240**** |
| Trail making test                 |               |               |            |            |            |
| Visuomotor speed                  | -0.274***     | -0.246****    | -0.294***  | 0.354***   | 0.284***   |
| Task switching                    | -0.307***     | -0.233****    | -0.181*    | 0.331***   | 0.270***   |
| Executive function                | -0.277***     | -0.194****    | -0.116     | 0.276***   | 0.225****  |
| CogState                          |               |               |            |            |            |
| Simple reaction time              | 0.244****     | 0.222****     | 0.195****  | -0.202**** | -0.252***  |
| Choice reaction time              | 0.276***      | 0.317***      | 0.160*     | -0.225**** | -0.255**** |
| Working memory speed              | 0.177*        | 0.183*        | 0.155*     | -0.187*    | -0.234**** |
| Working memory accuracy           | 0.206*        | 0.106         | 0.040      | -0.090     | -0.150*    |
| Executive function errors         | 0.233****     | 0.242****     | 0.152*     | -0.284***  | -0.229**** |
| CogState composite scores         |               |               |            |            |            |
| Psychomotor-attention             | 0.283***      | 0.307***      | 0.193**    | -0.233**   | -0.276***  |

|                         |          |          |         |           |           |
|-------------------------|----------|----------|---------|-----------|-----------|
| Working memory-learning | 0.253**  | 0.199**  | 0.123   | -0.176*   | -0.247*** |
| Global cognition        | 0.338*** | 0.323*** | 0.205** | -0.292*** | -0.330*** |

Data are Pearson’s correlation coefficient. P<0.05, \*\*P<0.01, \*\*\*P<0.001. Visuomotor speed (Trail making Test part A), Task Switching (Trail making Test part B), Executive Function (Trail making Test part B-A); Immediate recall (Rey Auditory Verbal Learning Test [RAVLT] trial 1); Verbal learning (RAVLT trial 1-5 inclusive); Delayed recall (RAVLT trial 7); Verbal recall (Digit Span forwards); Verbal working memory (Digit Span backward). CogState measures: Simple reaction time (DET speed); Choice reaction time (IND speed); Working memory speed (ONB speed), Working memory accuracy (ONB accuracy), Visuospatial executive function (GML errors); Psychomotor-attention (DET and IDN); Working-memory and learning (OCL and ONB), Global cognition (DET, IDN, and OCL)

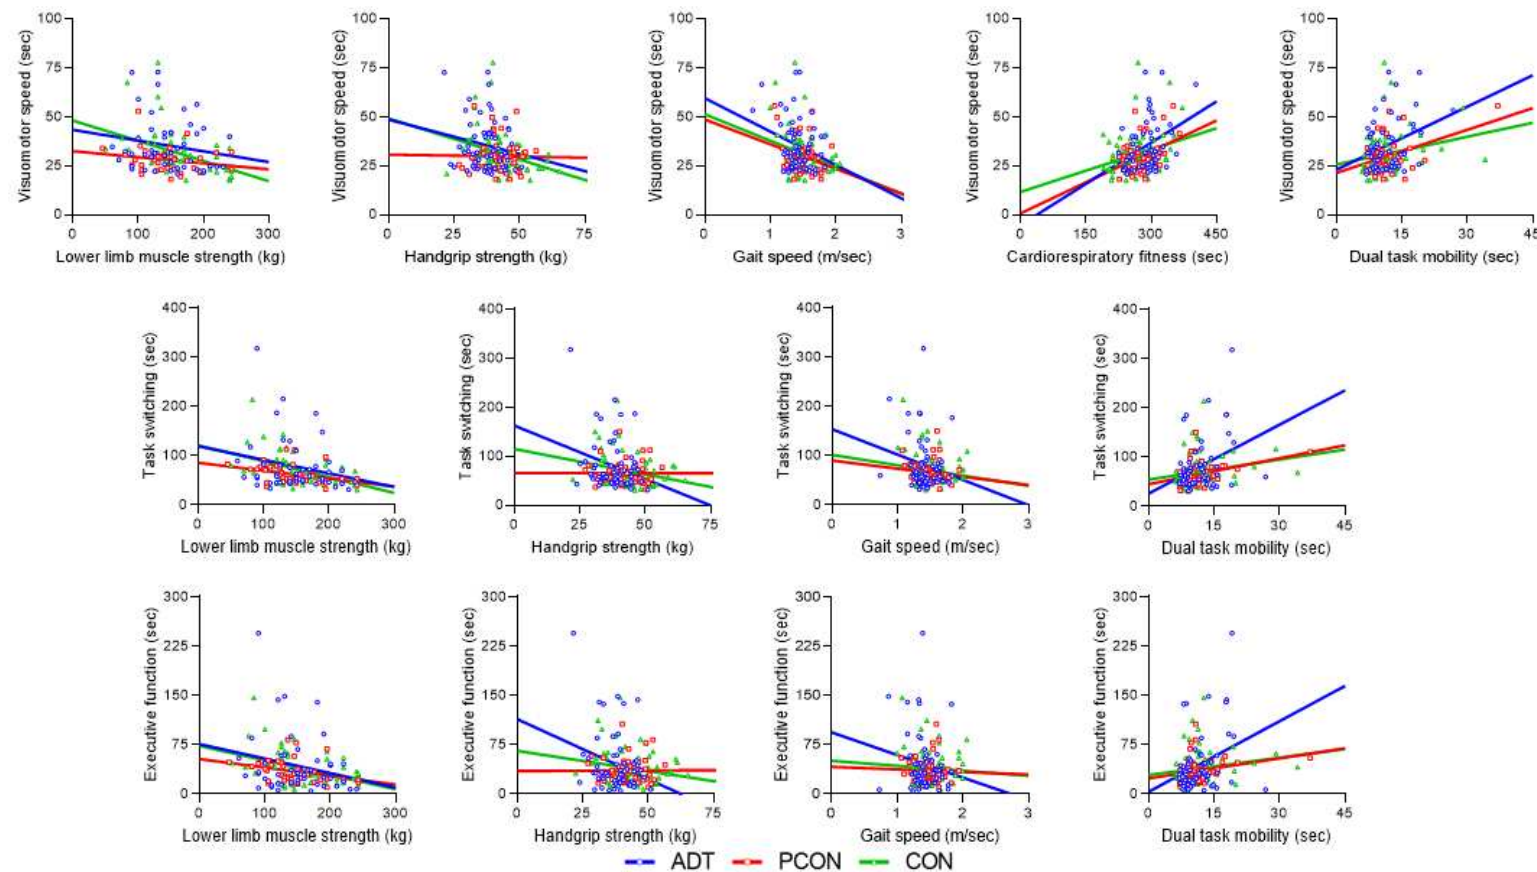

**Supplementary Figure 1.** Scatterplots of the relationship between measures of lower limb muscle strength (leg press three-repetition maximum), handgrip strength (handheld dynamometry), gait speed (4m usual walk), cardiorespiratory fitness (400m walk) and dual-task mobility (timed-up-

and-go with cognitive task) and visuo-motor speed (trail making test A), task switching (trail making test B), executive function (trail making test B-A) in men treated with androgen deprivation therapy (ADT), prostate cancer controls (PCON) and non-PCA controls (CON). ^ P<0.05 compared to CON.

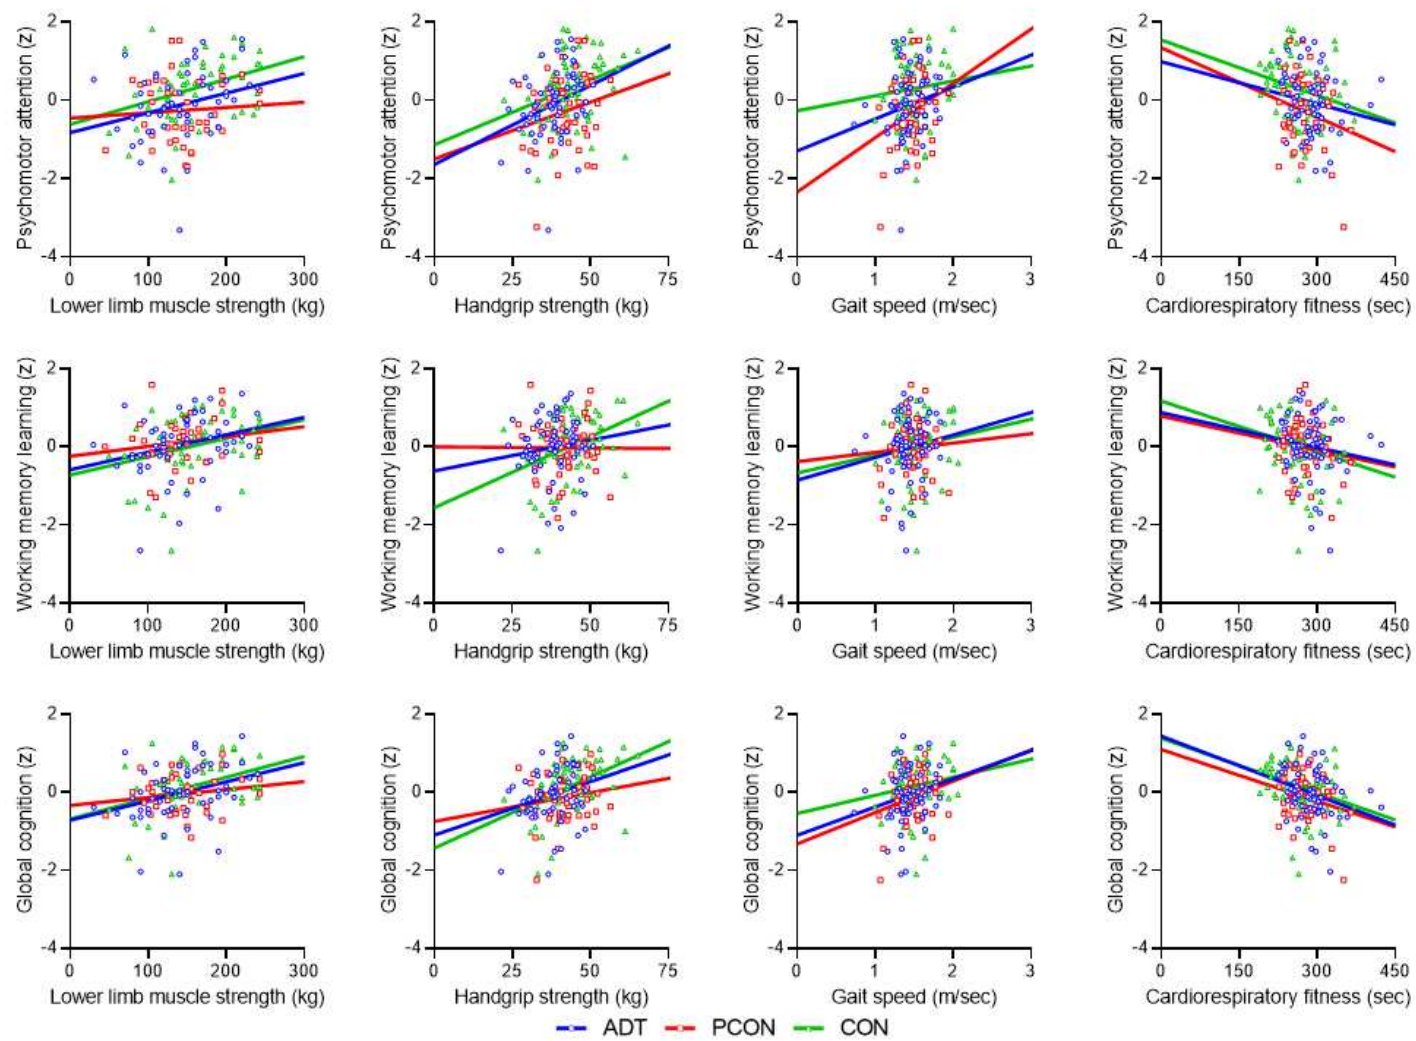

**Supplementary Figure 2.** Scatterplots of the relationship between measures of lower limb muscle strength (leg press three-repetition maximum), handgrip strength (handheld dynamometry), gait speed (4m usual walk), cardiorespiratory fitness (400m walk) and dual-task mobility (timed-up-and-go with cognitive task) and Cogstate psychomotor-attention composite score, Cogstate working memory-learning composite score and Cogstate global cognitive function score in men treated with androgen deprivation therapy (ADT), prostate cancer controls (PCON) and non-PCA controls (CON). ^ P<0.05 compared to CON.
